# Supplementary material for: Activated Phosphoinositide 3-Kinase Delta Syndrome 1: Clinical and Immunological Data from an Italian Cohort of Patients
Source: PubMed Central journal article supplement (PMC7603210; doi:10.3390/jcm9103335), 2020-10-17
Supplement: jcm-09-03335-s001.pdf [file jcm-09-03335-s001.pdf]

Supplementary materials

Table 1. Lymphocyte immunophenotyping of eight APDS-1 patients.

|                                                                                  | P1    |       | P2    |       | P3    |       | P4    |       | P5    |       | P6    |       | P7    |       | P8    |       |
|----------------------------------------------------------------------------------|-------|-------|-------|-------|-------|-------|-------|-------|-------|-------|-------|-------|-------|-------|-------|-------|
|                                                                                  | Linf% | Par%  | Linf% | Par%  | Linf% | Par%  | Linf% | Par%  | Linf% | Par%  | Linf% | Par%  | Linf% | Par%  | Linf% | Par%  |
| T Lymphocytes (CD3 <sup>+</sup> )                                                | 87.7↑ |       | 49.6↓ |       | 78.0  |       | 88.7↑ |       | 86.8↑ |       | 81.4↑ |       | 34.9↓ |       | 72.2  |       |
| CD3 <sup>+</sup> CD4 <sup>+</sup>                                                | 21.8↓ |       | 17.9↓ |       | 30.0  |       | 59.2  |       | 25.1↓ |       | 21.5↓ |       | 15.2↓ |       | 22.9↓ |       |
| CD4 <sup>+</sup> HLA-DR <sup>+</sup>                                             |       | 12.4↑ |       | 25.7↑ |       | n.a.  |       | 4.9   |       | 7.1   |       | 14.9↑ |       | n.a.  |       | 15.2  |
| Naïve (CD45RA <sup>+</sup> CCR7 <sup>+</sup> )                                   |       | 12.4↓ |       | 8.1↓  |       | 29.0↑ |       | 22.1  |       | 43.9  |       | 8.2↓  |       | 10.0↓ |       | 24.8↓ |
| RTE (CD45RA <sup>+</sup> CCR7 <sup>+</sup> CD31 <sup>+</sup> )                   |       | 6.4↓  |       | 3.6↓  |       | 0.0↓  |       | 19.5  |       | 26.5  |       | 5.8↓  |       | 5.2↓  |       | 20.5↓ |
| Centr. Mem. (CD45RA <sup>+</sup> CCR7 <sup>+</sup> )                             |       | 30.4  |       | 29.1  |       | 15.0  |       | 16.9  |       | 15.2  |       | 35.3  |       | 61.6↑ |       | 24.1  |
| Eff. Mem. (CD45RA <sup>+</sup> CCR7 <sup>-</sup> )                               |       | 52.0↑ |       | 59.8↑ |       | 71.0↑ |       | 60.3↑ |       | 32.0↑ |       | 54.3↑ |       | 28.1↑ |       | 43.1↑ |
| Term. Diff. (CD45RA <sup>+</sup> CCR7 <sup>-</sup> )                             |       | 5.2   |       | 3.0   |       | 0.0↓  |       | 0.6   |       | 8.8↑  |       | 2.2   |       | 0.3↓  |       | 8.3↑  |
| CD3 <sup>+</sup> CD8 <sup>+</sup>                                                | 62.0↑ |       | 27.7  |       | 23.0  |       | 21.2  |       | 58.3↑ |       | 53.2↑ |       | 26.27 |       | 41.7↑ |       |
| CD8 <sup>+</sup> HLA-DR <sup>+</sup>                                             |       | 18.5  |       | 47.3↑ |       | n.a.  |       | 7.8   |       | 25.2↑ |       | 19.0  |       | n.a.  |       | 16.7  |
| Naïve (CD45RA <sup>+</sup> CCR7 <sup>+</sup> )                                   |       | 1.3↓  |       | 3.4↓  |       | 15.0↓ |       | 30.3  |       | 17.7  |       | 2.3↓  |       | 9.8↓  |       | 2.4↓  |
| Centr. Mem. (CD45RA <sup>+</sup> CCR7 <sup>+</sup> )                             |       | 0.2↓  |       | 0.5↓  |       | 52.0↑ |       | 3.5   |       | 0.2↓  |       | 0.2↓  |       | 37.8↑ |       | 4.0   |
| Eff. Mem. (CD45RA <sup>+</sup> CCR7 <sup>-</sup> )                               |       | 38.3  |       | 39.1  |       | 33.0  |       | 24.5  |       | 42.0↑ |       | 31.9  |       | 38.8↑ |       | 41.9↑ |
| Term Diff. (CD45RA <sup>+</sup> CCR7 <sup>-</sup> )                              |       | 60.2  |       | 57.0  |       | 0.0↓  |       | 41.6  |       | 40.1  |       | 65.5↑ |       | 13.7  |       | 52.3  |
| CD4 <sup>+</sup> /CD8 <sup>+</sup>                                               | 0.35↓ |       | 0.65↓ |       | 1.3   |       | 0.3↓  |       | 0.43↓ |       | 0.4↓  |       | 0.6↓  |       | 0.3↓  |       |
| TCR Gamma/Delta                                                                  | 2.8   |       | 2.8   |       | 19.0↑ |       | 4.6   |       | 3.1   |       | 10.6  |       | n.a.  |       | n.a.  |       |
| CD57 <sup>+</sup>                                                                | 44.8↑ |       | 33.4↑ |       | 16.0↑ |       | n.a.  |       | 25.3↑ |       | n.a.  |       | n.a.  |       | n.a.  |       |
| CD8 <sup>+</sup> CD57 <sup>+</sup>                                               |       | 35.5↑ |       | 10.6↑ |       | 11.0↑ |       | n.a.  |       | 16.2↑ |       | n.a.  |       | n.a.  |       | n.a.  |
| B Lymphocytes (CD19 <sup>+</sup> )                                               | 7.4   |       | 8.7   |       | 4.0   |       | 0.4↓  |       | 1.5↓  |       | 12.5  |       | 0.9↓  |       | 8.9↓  |       |
| RBE (CD38 <sup>hi</sup> CD10 <sup>+</sup> )                                      |       | 4.3   |       | 46.0↑ |       | 0.0↓  |       | 21.8  |       | 40.5↑ |       | 57.7↑ |       | n.a.  |       | 41.8  |
| Naïve (IgD <sup>+</sup> CD21 <sup>hi</sup> CD10 <sup>-</sup> CD27 <sup>-</sup> ) |       | 32.9↓ |       | 5.0↓  |       | 0.0↓  |       | 56.9  |       | 0.0↓  |       | 6.1↓  |       | 36.4↓ |       | 10.2↓ |
| CD19 <sup>hi</sup> CD21 <sup>low</sup>                                           |       | 31.9↑ |       | 21.0↑ |       | 62.0↑ |       | 20.4↑ |       | 6.7   |       | 10.6↑ |       | 13.7↑ |       | 13.2↑ |
| Switched Mem. (IgD <sup>-</sup> IgM <sup>+</sup> CD27 <sup>+</sup> )             |       | 13.3  |       | 0.8↓  |       | 6.0   |       | 0.0↓  |       | 0.0↓  |       | 0.3↓  |       | 30.3↑ |       | 0.0↓  |
| IgM Mem. (IgD <sup>+</sup> IgM <sup>+</sup> CD27 <sup>+</sup> )                  |       | 8.7   |       | 2.4↓  |       | 19.0↑ |       | 0.9↓  |       | 0.0↓  |       | 0.4↓  |       | n.a.  |       | 4.1↓  |
| Term. Diff. (CD38 <sup>hi</sup> CD27 <sup>hi</sup> CD20 <sup>-</sup> )           |       | 6.3   |       | 20.8↑ |       | 0.0↓  |       | 0.0↓  |       | 45.9↑ |       | 22.3↑ |       | n.a.  |       | 27.8↑ |
| NK Cells                                                                         |       |       |       |       |       |       |       |       |       |       |       |       |       |       |       |       |
| NK Cells (CD3 <sup>+</sup> CD16 <sup>+</sup> CD56 <sup>+</sup> )                 | 4.6   |       | 40.7↑ |       | 5.0   |       | 8.6   |       | 11.5  |       | 5.7   |       | 35.4↑ |       | 15.7  |       |

Abbreviations: APDS-1: Activated Phosphoinositide 3-Kinase Delta Syndrome-1, Centr. Mem.: Central Memory, Eff. Mem.: Effector Memory, IgM: immunoglobulin M, NK: Natural Killer, RBE: Recent Bone Marrow Emigrants, RTE: Recent Thymic Emigrants, Switched Mem.: Switched Memory, TCR: T-cell receptor, Term. Diff.: Terminally Differentiated. Notes: n.a.: not available; ↓: lower than a pool of age-specific healthy subjects; ↑: higher than a pool of age-specific healthy subjects.
